# Supplementary material
Source: Springer Nature journal article supplement (https://www.springermedizin.de/resource/supplementary/12885_2011_2848_MOESM1_ESM.PDF/9462082)
Supplement: MOESM1 [file 9462082]

# Additional file 1

## Estimation of AUC

For each cycle, AUC was calculated. Concentration of doxorubicin was estimated in plasma immediately after infusion of PLD ( $c_0$ ), prior to onset of apheresis ( $c_{\text{aphstart}}$ ) and after termination of apheresis ( $c_{\text{aphend}}$ ). Elimination of Caelyx was assumed first order and monophasic<sup>2</sup> (equ. 3).

$$c(t) = c_0 \cdot \exp\left(-\frac{1}{k}t\right) \quad (3)$$

With

$$k = \frac{t_{1/2}}{0.693} \quad (4)$$

The constant  $k$  was estimated by regression analysis using the measured doxorubicin concentrations  $c_0$  and  $c_{\text{aphstart}}$ . Regression was done iterative by slide write curve fitting function (Slide Write 6.0, Advanced graphics software Inc., California, USA).

To calculate the AUC, the respective integrals of equ. 3 were used. To calculate AUC without apheresis ( $AUC_{\text{normal}}$ ), the integral between  $t=0$  and  $t=504$  (3 weeks = 21 days = 504 h) was estimated.

$$AUC_{\text{normal}} = \int_0^{504} c_0 \cdot -k \cdot \exp\left(-\frac{1}{k}t\right) \quad (5)$$

For calculating of the AUC with apheresis ( $AUC_A$ ), the AUC of three distinct phases were summarized:

$$AUC_{\text{apher}} = AUC_{\text{apher1}} + AUC_{\text{apher2}} + AUC_{\text{apher3}} \quad (6)$$

$AUC_{\text{apher1}}$  corresponds to the AUC until the onset of apheresis,  $AUC_{\text{apher2}}$  corresponds to the AUC during the time of apheresis, and  $AUC_{\text{apher3}}$  describes the AUC from termination of apheresis until end of cycle.

With  $t_{aphstart}$  being the time in hours until apheresis was initiated,  $AUC_{apher1}$  was calculated in the same way as  $AUC_{normal}$ :

$$AUC_{apher1} = \int_0^{t_{aphstart}} c_0 \cdot -k \cdot \exp\left(-\frac{1}{k}t\right) dt \quad (7)$$

With  $c_{aphstart}$  being the plasma concentration of doxorubicin at apheresis onset,  $c_{aphend}$  being the respective concentration when apheresis was terminated, and  $t_{apher}$  being the duration of apheresis (~3-4 h),  $AUC_{Phase2}$  was calculated:

$$AUC_{apher2} = (c_{aphstart} - c_{aphend}) \cdot t_{apher} \quad (8)$$

When apheresis was terminated, elimination was assumed to proceed normal, and  $AUC_{apher3}$  was calculated from  $t=t_{aphend}$  until the end of cycle ( $t=504$  h) using  $c_{aphend}$  and  $k$ .

$$AUC_{Phase3} = \int_{t_{aphend}}^{504} c_{aphend} \cdot -k \cdot \exp\left(-\frac{1}{k}t\right) dt \quad (9)$$

The differences in AUC were calculated as:

$$\Delta AUC = \left(1 - \frac{AUC_{Apher}}{AUC_0}\right) \cdot 100 \text{ [%]} \quad (10)$$
